# Supplementary material for: Assessment of Lipophilicity Parameters of Antimicrobial and Immunosuppressive Compounds
Source: MDPI journal article supplement (doi:10.3390/molecules28062820), 2023-03-21
Supplement: s1 [file s1]

**Table S1.** Data for linear correlation (Equation 1) between  $R_M$  values and the content of organic modifier in the mobile phase for delafloxacin. Where: correlation coefficient ( $R^2$ ), standard error of estimation (SEE); F-factor; significance level (p), volume fraction of organic modifier in mobile phase ( $\phi$ ).

| Ethanol – water (v/v)      |                     |                     |       |        |        |        |             |
|----------------------------|---------------------|---------------------|-------|--------|--------|--------|-------------|
| Stationary phase           | $R_{MW} \pm SE$     | $b \pm SE$          | $R^2$ | SEE    | F      | p      | $\phi$      |
| RP18F <sub>254</sub>       | 2.1359 $\pm$ 0.2132 | 3.1130 $\pm$ 0.3492 | 90.85 | 0.1929 | 79.48  | 0.0000 | 0.30 – 0.90 |
| RP18WF <sub>254</sub>      | 1.9694 $\pm$ 0.2233 | 2.9218 $\pm$ 0.3658 | 88.86 | 0.2021 | 63.80  | 0.0000 | 0.30 – 0.90 |
| RP2F <sub>254</sub>        | 0.9184 $\pm$ 0.2056 | 1.9995 $\pm$ 0.3368 | 81.50 | 0.1861 | 35.25  | 0.0003 | 0.30 – 0.90 |
| Acetonitrile – water (v/v) |                     |                     |       |        |        |        |             |
| Stationary phase           | $R_{MW} \pm SE$     | $b \pm SE$          | $R^2$ | SEE    | F      | p      | $\phi$      |
| RP18F <sub>254</sub>       | 2.3174 $\pm$ 0.2273 | 3.7385 $\pm$ 0.4261 | 92.77 | 0.1505 | 76.98  | 0.0001 | 0.30 – 0.70 |
| RP18WF <sub>254</sub>      | 1.8351 $\pm$ 0.1579 | 3.0359 $\pm$ 0.3124 | 94.97 | 0.0922 | 94.44  | 0.0002 | 0.30 – 0.65 |
| RP2F <sub>254</sub>        | 0.6615 $\pm$ 0.0838 | 1.6300 $\pm$ 0.1758 | 95.55 | 0.0424 | 86.00  | 0.0008 | 0.30 – 0.60 |
| Propan-2-ol – water (v/v)  |                     |                     |       |        |        |        |             |
| Stationary phase           | $R_{MW} \pm SE$     | $b \pm SE$          | $R^2$ | SEE    | F      | p      | $\phi$      |
| RP18F <sub>254</sub>       | 1.7719 $\pm$ 0.1543 | 3.3049 $\pm$ 0.2892 | 95.61 | 0.1021 | 130.55 | 0.0000 | 0.30 – 0.70 |
| RP18WF <sub>254</sub>      | 1.6940 $\pm$ 0.1578 | 3.2557 $\pm$ 0.2584 | 95.20 | 0.1428 | 158.70 | 0.0000 | 0.30 – 0.90 |
| RP2F <sub>254</sub>        | 0.7390 $\pm$ 0.0916 | 2.0590 $\pm$ 0.1609 | 95.90 | 0.0711 | 163.67 | 0.0000 | 0.30 – 0.80 |

**Table S2.** Data for linear correlation (Equation 1) between  $R_M$  values and the content of organic modifier in the mobile phase for linezolid. Where: correlation coefficient ( $R^2$ ), standard error of estimation (SEE); F-factor; significance level (p), volume fraction of organic modifier in mobile phase ( $\phi$ ).

| Ethanol – water (v/v)      |                     |                     |       |        |        |        |             |
|----------------------------|---------------------|---------------------|-------|--------|--------|--------|-------------|
| Stationary phase           | $R_{MW} \pm SE$     | $b \pm SE$          | $R^2$ | SEE    | F      | p      | $\phi$      |
| RP18F <sub>254</sub>       | 1.1926 $\pm$ 0.1197 | 2.1316 $\pm$ 0.1961 | 93.66 | 0.1083 | 118.19 | 0.0000 | 0.30 – 0.90 |
| RP18WF <sub>254</sub>      | 1.3407 $\pm$ 0.1844 | 2.5770 $\pm$ 0.3020 | 90.10 | 0.1668 | 72.82  | 0.0000 | 0.30 – 0.90 |
| RP2F <sub>254</sub>        | 0.9592 $\pm$ 0.1053 | 2.1849 $\pm$ 0.1724 | 95.25 | 0.0953 | 160.55 | 0.0000 | 0.30 – 0.90 |
| Acetonitrile – water (v/v) |                     |                     |       |        |        |        |             |
| Stationary phase           | $R_{MW} \pm SE$     | $b \pm SE$          | $R^2$ | SEE    | F      | p      | $\phi$      |
| RP18F <sub>254</sub>       | 1.5263 $\pm$ 0.1071 | 2.7846 $\pm$ 0.2246 | 97.46 | 0.0542 | 153.67 | 0.0002 | 0.30 – 0.60 |
| RP18WF <sub>254</sub>      | 1.1927 $\pm$ 0.1187 | 2.0267 $\pm$ 0.2225 | 93.26 | 0.0785 | 83.00  | 0.0001 | 0.30 – 0.70 |
| RP2F <sub>254</sub>        | 0.8183 $\pm$ 0.0766 | 1.6660 $\pm$ 0.1605 | 96.42 | 0.0388 | 107.70 | 0.0005 | 0.30 – 0.60 |
| Propan-2-ol – water (v/v)  |                     |                     |       |        |        |        |             |
| Stationary phase           | $R_{MW} \pm SE$     | $b \pm SE$          | $R^2$ | SEE    | F      | p      | $\phi$      |
| RP18F <sub>254</sub>       | 0.7884 $\pm$ 0.0661 | 1.7600 $\pm$ 0.1161 | 97.04 | 0.0513 | 229.72 | 0.0000 | 0.30 – 0.80 |
| RP18WF <sub>254</sub>      | 1.1239 $\pm$ 0.1911 | 2.4862 $\pm$ 0.3131 | 88.74 | 0.1730 | 63.05  | 0.0000 | 0.30 – 0.90 |
| RP2F <sub>254</sub>        | 0.8826 $\pm$ 0.0794 | 2.2085 $\pm$ 0.1301 | 97.30 | 0.0719 | 288.20 | 0.0000 | 0.30 – 0.90 |

**Table S3.** Data for linear correlation (Equation 1) between  $R_M$  values and the content of organic modifier in the mobile phase for sutezolid. Where: correlation coefficient ( $R^2$ ), standard error of estimation (SEE); F-factor; significance level (p), volume fraction of organic modifier in mobile phase ( $\phi$ ).

| Ethanol – water (v/v)      |                     |                     |       |        |         |        |             |
|----------------------------|---------------------|---------------------|-------|--------|---------|--------|-------------|
| Stationary phase           | $R_{MW} \pm SE$     | $b \pm SE$          | $R^2$ | SEE    | F       | p      | $\phi$      |
| RP18F <sub>254</sub>       | 1.8680 $\pm$ 0.1436 | 2.7763 $\pm$ 0.2352 | 94.57 | 0.1299 | 139.38  | 0.0000 | 0.30 – 0.90 |
| RP18WF <sub>254</sub>      | 1.9661 $\pm$ 0.2003 | 3.2236 $\pm$ 0.3280 | 92.35 | 0.1812 | 96.57   | 0.0000 | 0.30 – 0.90 |
| RP2F <sub>254</sub>        | 1.4334 $\pm$ 0.1648 | 2.6154 $\pm$ 0.2699 | 92.15 | 0.1491 | 93.92   | 0.0000 | 0.30 – 0.90 |
| Acetonitrile – water (v/v) |                     |                     |       |        |         |        |             |
| Stationary phase           | $R_{MW} \pm SE$     | $b \pm SE$          | $R^2$ | SEE    | F       | p      | $\phi$      |
| RP18F <sub>254</sub>       | 2.2114 $\pm$ 0.1711 | 3.6252 $\pm$ 0.3387 | 95.82 | 0.1000 | 114.57  | 0.0001 | 0.30 – 0.65 |
| RP18WF <sub>254</sub>      | 2.0329 $\pm$ 0.1073 | 3.2897 $\pm$ 0.2123 | 97.96 | 0.0627 | 240.20  | 0.0000 | 0.30 – 0.65 |
| RP2F <sub>254</sub>        | 1.4312 $\pm$ 0.2173 | 2.6897 $\pm$ 0.4556 | 89.71 | 0.1100 | 34.86   | 0.0041 | 0.30 – 0.60 |
| Propan-2-ol – water (v/v)  |                     |                     |       |        |         |        |             |
| Stationary phase           | $R_{MW} \pm SE$     | $b \pm SE$          | $R^2$ | SEE    | F       | p      | $\phi$      |
| RP18F <sub>254</sub>       | 1.5937 $\pm$ 0.0834 | 2.8753 $\pm$ 0.1562 | 98.26 | 0.0552 | 338.61  | 0.0000 | 0.30 – 0.70 |
| RP18WF <sub>254</sub>      | 1.4784 $\pm$ 0.0282 | 2.7391 $\pm$ 0.0528 | 99.78 | 0.0187 | 2687.10 | 0.0000 | 0.30 – 0.70 |
| RP2F <sub>254</sub>        | 1.1590 $\pm$ 0.0997 | 2.4285 $\pm$ 0.1633 | 96.51 | 0.0902 | 221.18  | 0.0000 | 0.30 – 0.90 |

**Table S4.** Data for linear correlation (Equation 1) between  $R_M$  values and the content of organic modifier in the mobile phase for ceftazidime. Where: correlation coefficient ( $R^2$ ), standard error of estimation (SEE); F-factor; significance level (p), volume fraction of organic modifier in mobile phase ( $\phi$ ).

| Ethanol – water (v/v)      |                      |                      |       |        |         |        |             |
|----------------------------|----------------------|----------------------|-------|--------|---------|--------|-------------|
| Stationary phase           | $R_{MW} \pm SE$      | $b \pm SE$           | $R^2$ | SEE    | F       | p      | $\phi$      |
| RP18F <sub>254</sub>       | -2.9545 $\pm$ 0.2885 | -3.3446 $\pm$ 0.5317 | 95.19 | 0.0786 | 39.57   | 0.0244 | 0.40 – 0.65 |
| RP18WF <sub>254</sub>      | 0.4152 $\pm$ 0.1205  | 1.0246 $\pm$ 0.2117  | 76.99 | 0.0935 | 23.42   | 0.0019 | 0.30 – 0.80 |
| RP2F <sub>254</sub>        | -0.6643 $\pm$ 0.0179 | 1.9533 $\pm$ 0.0385  | 99.96 | 0.0082 | 2575.47 | 0.0125 | 0.30 – 0.60 |
| Acetonitrile – water (v/v) |                      |                      |       |        |         |        |             |
| Stationary phase           | $R_{MW} \pm SE$      | $b \pm SE$           | $R^2$ | SEE    | F       | p      | $\phi$      |
| RP18F <sub>254</sub>       | 0.1462 $\pm$ 0.1058  | 1.4131 $\pm$ 0.2525  | 94.00 | 0.0373 | 31.33   | 0.0305 | 0.30 – 0.50 |
| RP18WF <sub>254</sub>      | 0.4121 $\pm$ 0.1287  | 1.3463 $\pm$ 0.2213  | 90.24 | 0.0463 | 36.99   | 0.0037 | 0.45 – 0.70 |
| RP2F <sub>254</sub>        | -0.0357 $\pm$ 0.2291 | 3.0260 $\pm$ 0.4804  | 90.84 | 0.1160 | 39.67   | 0.0032 | 0.30 – 0.60 |
| Propan-2-ol – water (v/v)  |                      |                      |       |        |         |        |             |
| Stationary phase           | $R_{MW} \pm SE$      | $b \pm SE$           | $R^2$ | SEE    | F       | p      | $\phi$      |
| RP18F <sub>254</sub>       | 0.4691 $\pm$ 0.3767  | 3.1340 $\pm$ 0.6225  | 92.69 | 0.0984 | 25.35   | 0.0373 | 0.50 – 0.70 |
| RP18WF <sub>254</sub>      | 0.9153 $\pm$ 0.0236  | 3.9500 $\pm$ 0.0577  | 99.98 | 0.0082 | 4680.75 | 0.0093 | 0.30 – 0.60 |
| RP2F <sub>254</sub>        | -0.3642 $\pm$ 0.0639 | 1.9300 $\pm$ 0.0981  | 99.74 | 0.0069 | 386.67  | 0.0323 | 0.60 – 0.80 |

**Table S5.** Data for linear correlation (Equation 1) between  $R_M$  values and the content of organic modifier in the mobile phase for everolimus. Where: correlation coefficient ( $R^2$ ), standard error of estimation (SEE); F-factor; significance level (p), volume fraction of organic modifier in mobile phase ( $\phi$ ).

| Ethanol – water (v/v)      |                     |                     |       |        |        |        |             |
|----------------------------|---------------------|---------------------|-------|--------|--------|--------|-------------|
| Stationary phase           | $R_{MW} \pm SE$     | $b \pm SE$          | $R^2$ | SEE    | F      | p      | $\phi$      |
| RP18F <sub>254</sub>       | 3.5637 $\pm$ 0.4934 | 4.4741 $\pm$ 0.6948 | 91.20 | 0.2026 | 41.46  | 0.0030 | 0.55 – 0.90 |
| RP18WF <sub>254</sub>      | 2.8227 $\pm$ 0.2705 | 3.7623 $\pm$ 0.3955 | 94.76 | 0.1366 | 90.47  | 0.0002 | 0.50 – 0.90 |
| RP2F <sub>254</sub>        | 2.9460 $\pm$ 0.2792 | 4.1739 $\pm$ 0.4082 | 95.44 | 0.1410 | 104.55 | 0.0002 | 0.50 – 0.90 |
| Acetonitrile – water (v/v) |                     |                     |       |        |        |        |             |
| Stationary phase           | $R_{MW} \pm SE$     | $b \pm SE$          | $R^2$ | SEE    | F      | p      | $\phi$      |
| RP18F <sub>254</sub>       | 2.9462 $\pm$ 0.1616 | 3.3324 $\pm$ 0.2362 | 97.55 | 0.0816 | 199.04 | 0.0000 | 0.50 – 0.90 |
| RP18WF <sub>254</sub>      | 2.7737 $\pm$ 0.0865 | 3.7501 $\pm$ 0.1401 | 99.31 | 0.0414 | 716.43 | 0.0000 | 0.45 – 0.80 |
| RP2F <sub>254</sub>        | 2.8557 $\pm$ 0.3023 | 4.1954 $\pm$ 0.5201 | 94.21 | 0.1088 | 65.07  | 0.0013 | 0.45 – 0.70 |
| Propan-2-ol – water (v/v)  |                     |                     |       |        |        |        |             |
| Stationary phase           | $R_{MW} \pm SE$     | $b \pm SE$          | $R^2$ | SEE    | F      | p      | $\phi$      |
| RP18F <sub>254</sub>       | 2.5865 $\pm$ 0.3308 | 4.0314 $\pm$ 0.5565 | 89.74 | 0.1965 | 52.48  | 0.0004 | 0.40 – 0.80 |
| RP18WF <sub>254</sub>      | 2.5687 $\pm$ 0.1728 | 4.2893 $\pm$ 0.3091 | 97.47 | 0.0818 | 192.61 | 0.0000 | 0.40 – 0.70 |
| RP2F <sub>254</sub>        | 2.2145 $\pm$ 0.2158 | 3.8021 $\pm$ 0.3631 | 94.81 | 0.1282 | 109.66 | 0.0000 | 0.40 – 0.80 |

**Table S6.** Data for linear correlation (Equation 1) between  $R_M$  values and the content of organic modifier in the mobile phase for zotarolimus. Where: correlation coefficient ( $R^2$ ), standard error of estimation (SEE); F-factor; significance level (p), volume fraction of organic modifier in mobile phase ( $\phi$ ).

| Ethanol – water (v/v)      |                     |                     |       |        |        |        |             |
|----------------------------|---------------------|---------------------|-------|--------|--------|--------|-------------|
| Stationary phase           | $R_{MW} \pm SE$     | $b \pm SE$          | $R^2$ | SEE    | F      | p      | $\phi$      |
| RP18F <sub>254</sub>       | 3.1105 $\pm$ 0.4265 | 4.0724 $\pm$ 0.6007 | 91.99 | 0.1751 | 45.96  | 0.0025 | 0.55 – 0.90 |
| RP18WF <sub>254</sub>      | 2.7377 $\pm$ 0.3661 | 3.7065 $\pm$ 0.5156 | 92.82 | 0.1503 | 51.68  | 0.0020 | 0.55 – 0.90 |
| RP2F <sub>254</sub>        | 3.3623 $\pm$ 0.2125 | 4.7845 $\pm$ 0.3224 | 97.35 | 0.1298 | 220.26 | 0.0000 | 0.45 – 0.90 |
| Acetonitrile – water (v/v) |                     |                     |       |        |        |        |             |
| Stationary phase           | $R_{MW} \pm SE$     | $b \pm SE$          | $R^2$ | SEE    | F      | p      | $\phi$      |
| RP18F <sub>254</sub>       | 3.1252 $\pm$ 0.0939 | 3.5524 $\pm$ 0.1373 | 99.26 | 0.0474 | 669.48 | 0.0000 | 0.50 – 0.90 |
| RP18WF <sub>254</sub>      | 3.2300 $\pm$ 0.2319 | 4.4507 $\pm$ 0.3757 | 96.56 | 0.1109 | 140.31 | 0.0001 | 0.45 – 0.80 |
| RP2F <sub>254</sub>        | 2.7480 $\pm$ 0.3069 | 3.6464 $\pm$ 0.4971 | 91.50 | 0.1467 | 53.80  | 0.0007 | 0.45 – 0.80 |
| Propan-2-ol – water (v/v)  |                     |                     |       |        |        |        |             |
| Stationary phase           | $R_{MW} \pm SE$     | $b \pm SE$          | $R^2$ | SEE    | F      | p      | $\phi$      |
| RP18F <sub>254</sub>       | 2.4741 $\pm$ 0.1837 | 4.0474 $\pm$ 0.3160 | 97.62 | 0.0661 | 164.04 | 0.0002 | 0.45 – 0.70 |
| RP18WF <sub>254</sub>      | 2.7821 $\pm$ 0.1585 | 4.7646 $\pm$ 0.2980 | 98.46 | 0.0623 | 255.70 | 0.0001 | 0.40 – 0.65 |
| RP2F <sub>254</sub>        | 2.1522 $\pm$ 0.1723 | 3.7045 $\pm$ 0.2711 | 96.39 | 0.1257 | 186.77 | 0.0000 | 0.40 – 0.90 |

**Supplementary Materials:** The following materials can be downloaded at: [www.mdpi.com/xxx/s1](http://www.mdpi.com/xxx/s1), Table S1: Data for linear correlation (Equation 1) between  $R_M$  values and the content of organic modifier in the mobile phase for delafloxacin. Where: correlation coefficient ( $R^2$ ), standard error of estimation (SEE); F-factor; significance level (p), volume fraction of organic modifier in mobile phase ( $\phi$ ); Table S2: Data for linear correlation (Equation 1) between  $R_M$  values and the content of organic modifier in the mobile phase for linezolid. Where: correlation coefficient ( $R^2$ ), standard error of estimation (SEE); F-factor; significance level (p), volume fraction of organic modifier in mobile phase ( $\phi$ ); Table S3: Data for linear correlation (Equation 1) between  $R_M$  values and the content of organic modifier in the mobile phase for sutezolid. Where: correlation coefficient ( $R^2$ ), standard error of estimation (SEE); F-factor; significance level (p), volume fraction of organic modifier in mobile phase ( $\phi$ ); Table S4: Data for linear correlation (Equation 1) between  $R_M$  values and the content of organic modifier in the mobile phase for ceftazidime. Where: correlation coefficient ( $R^2$ ), standard error of estimation (SEE); F-factor; significance level (p), volume fraction of organic modifier in mobile phase ( $\phi$ ); Table S5: Data for linear correlation (Equation 1) between  $R_M$  values and the content of organic modifier in the mobile phase for everolimus. Where: correlation coefficient ( $R^2$ ), standard error of estimation (SEE); F-factor; significance level (p), volume fraction of organic modifier in mobile phase ( $\phi$ ); Table S6: Data for linear correlation (Equation 1) between  $R_M$  values and the content of organic modifier in the mobile phase for zotarolimus. Where: correlation coefficient ( $R^2$ ), standard error of estimation (SEE); F-factor; significance level (p), volume fraction of organic modifier in mobile phase ( $\phi$ ).
